# Supplementary material for: Random uncertainties of flux measurements by the eddy covariance technique
Source: Copernicus journal article supplement (doi:10.5194/amt-2016-31), 2016-02-15
Supplement: Supplementary file [file amt-2016-31-AC2-supplement.pdf]

1. While this is overall a very good paper, I find that there are a few issues that could use further explanation and clarification. One issue is contained in the authors equation 8. Through this, they imply that arbitrarily small instrument noise can be obtained through longer and longer integration times. While this is true for a limited range of integrations, it is not true in general. In fact, this is the basis of Allen Variance plots which show the actual noise floor for an instrument. This should be made clear in the text, and they should offer some evidence that their computations do not violate the limits where eqn. 8 holds.

Equation (8) applies under the assumption that the instrumental noise is the white noise. The white noise has been frequently observed at power spectra as the +1 slope when the spectrum is weighed with the frequency. In natural signals turbulent variation and noise are combined in the signal and therefore the power spectra as well as Allan variance plots show the characteristics of the combined signal. Therefore eq. (8) cannot be utilised for natural records. However, for theoretical consideration of the white noise the equation holds because by definition the white noise has equal power at all frequencies.

We clarify this in the manuscript stating that the eq. (8) is valid for white noise.

2. Another issue is their statement that "...the noise component of the vertical wind speed measurement is negligible." While this is small, it must be viewed in the context of usually small vertical wind speed fluctuations. If this were true, then the same could be said of horizontal wind speeds and sonic temperatures which all derive from the same fundamental measurement (sound pulse transit times). If they wish to stand by this statement, they need to provide evidence that it is true, especially in the context of other sonic anemometer parameters.

The noise level of the sonic anemometers is typically a few hundredths of  $\text{m s}^{-1}$ . For example, Rannik et. al. (2015) reported the noise level of an anemometer USA1 by METEK to be  $0.037 \text{ m s}^{-1}$  at 10 Hz sampling frequency for the vertical wind speed component and a similar value for the anemometer model R3-50, Gill Instruments, Ltd., Hampshire, UK.

In analogy to eq. (7) in the manuscript, the flux error due to instrumental noise can be written as

$$\delta_{F,N} = \frac{\sqrt{\sigma_{n_w,f}^2 \sigma_c^2 + \sigma_w^2 \sigma_{n_c,f}^2}}{\sqrt{fT}}, \text{ where subscripts } n_w \text{ and } n_c \text{ represent the instrumental noise of}$$

the vertical wind speed and scalar concentration measurements. Typical values of  $\sigma_w$  vary between 0.1 to  $1 \text{ m s}^{-1}$ . This yields for the sonic anemometers the signal-to-noise ratio values as defined in the MS,

$$SNR_w = \frac{\sigma_w}{\sigma_{n_w,f}}, \text{ in the order from 1 (if to assume very small } \sigma_w \text{ } 0.05 \text{ m s}^{-1} \text{ and } \sigma_{n_w,f} \text{ } 0.04 \text{ m s}^{-1} \text{ at}$$

10 Hz) to 25. Following the atmospheric similarity relationships (under near neutral conditions)

$\sigma_w = 1.25u_*$  and  $\sigma_c = 3c_*$ , the expression for relative flux error can be written as

$$\frac{\delta_{F,N}}{|F|} = \frac{1.25 \times 3 \sqrt{(SNR_w^2)^{-1} + (SNR_c^2)^{-1}}}{\sqrt{fT}}, \text{ where SNR with subscripts } w \text{ and } c \text{ denote the values for}$$

wind speed and scalar concentration measurements. It can be seen that the relative contribution of the anemometer and gas analyser noise depends on the respective SNR values and the higher the SNR the smaller is the contribution to the flux error. The estimated SNR values for the sonic anemometers are typically larger than the respective values for the gas analysers under most of the observation conditions and the relative flux error resulting from the sonic anemometer noise is thus estimated to be in the order of 0.1 to 2% for 30 min averaging period. This is small enough to be negligible from the practical point of view. The same applies for the noise estimated for the sonic temperature measurements (Table 3 in the manuscript) and can be the case also with many other scalars. However, we meant that the noise of the modern sonic anemometers does not contribute significantly to the flux error and can be usually ignored.

We modify the eq. (7) in the manuscript to include also the effect of the anemometer's noise as given above.

One problem that may contribute to this confusion is the nature by which sonic anemometer data are often recorded. If the wind speeds (and temperature or speed of sound) are recorded digitally, the data streams often are comprised of ASCII character strings where the data are truncated. This may give the impression that the instrument has little or no noise for a particular measurement, but examination of the same data stream, formatted as a binary output might show otherwise. How would a significant noise factor in vertical wind speed change equations 7 and 8?

We modify the equation 7 to include also the contribution of the anemometer noise in flux error, see the previous answer.

3. When the authors discuss the "shuffle" method, they claim that equation 11 is equivalent to equation 7. Where is the justification for this. It's not clear that this is so, and a better derivation would be helpful here.

The equation (11) is a method proposed by Billesbach (2011) and included random re-ordering ("shuffling") of one variable with respect to each other, which makes the two time series fully uncorrelated.

Let us assume discrete time series  $w$  and  $s$  (which have zero means for simplicity), which have variances  $\sigma_w$  and  $\sigma_s$ . After random shuffling the series  $s$  it will have the same variance as before shuffling but it is uncorrelated in time (the correlation function is 0 except at zero lag equals to 1). Random shuffling makes also  $s$  uncorrelated with respect to  $w$ . By definition the variance of the product of two independent variables (with zero means) is the product of the variances of the variables, i.e. if  $\varphi = w s$ , then  $\sigma_\varphi^2 = \sigma_w^2 \sigma_s^2$ . The error of the average of  $\varphi$  (the standard error) over  $N$  realisations is given by  $\delta_\varphi = \frac{\sigma_\varphi}{\sqrt{N}}$ , which, assuming the time series with length  $T$  sampled at frequency  $f$  ( $N = fT$ ), gives the

error estimate of time-average  $\varphi$  as  $\delta_\varphi = \frac{\sigma_w \sigma_s}{\sqrt{fT}}$ . Thus eq. (11) becomes equivalent to (7) when replacing  $n$  with  $s$  in eq. (7).

Finally it seems that equations 7 and 12 assume perfect correlation between the noise components of vertical wind speed and "s". One often seen definition of correlation coefficient is the ratio of equation 11 to equation 7. Why does this factor disappear in this analysis?

Equation 7 and 12 assume that the noise of the vertical wind component is negligible (thus taken zero). Thus it does not assume perfect correlation of the noise components of  $w$  and  $s$ . For the error estimate including the noise in vertical wind speed see the answer to the comment 2 above.

In section 4.3.2, the authors assert that the "shuffle" method over-estimates the instrument system noise because it includes residual turbulent fluctuation information. This would be expected from the description contained in Billesbach's paper. In it, they show that some level of averaging (over different ensembles) is needed to generate a robust noise estimate. The question then arises "What level of averaging did the current authors use, and would they arrive at different conclusions if they included a larger ensemble sample in their analysis?"

The random shuffle method essentially treats the turbulent variation as noise and thus the method does not produce equivalent error estimate to the method by Lenschow et al. (2000) and Mauder et al. (2013). The method by Lenschow et al. (2000) gives the uncertainty of the covariance due to instrumental noise

under the hypothetical conditions of no turbulent fluctuations and has thus (to our opinion) clear physical meaning. We were not able to give clear interpretation to the error estimate by Billesbach (2011).

We used 20 repetitions when calculating the uncertainty estimates with random shuffle method, which should be enough to obtain robust estimates (Billesbach, 2011). However, the amount of repetitions only decreases the uncertainty of the error estimate and it does not change the fact that the method treats turbulent variation as noise and thus overestimates the flux error related to instrumental noise only.

Rannik, Ü., Haapanala, S., Shurpali, N., Mammarella, I., Lind, S., Hyvönen, N., Peltola, O., Zahniser, M., Martikainen, P. J., and Vesala, T.: Intercomparison of fast response commercial gas analysers for nitrous oxide flux measurements under field conditions, *Biogeosciences*. 12, 415-432, 2015.
